# Supplementary material for: Alzheimer’s Disease-Like Brain Pattern Biomarker: Capturing Risks and Predicting Disease Onset
Source: Research Square preprint supplement (doi:10.21203/rs.3.rs-6770628/v1), 2025-09-15

**Supplementary Information**

Alzheimer’s Disease-Like Brain Pattern Biomarker:

Capturing Risks and Predicting Disease Onset

Peter Kochunov PhDa, Si Gao MS a, Lauren E. Salminen PhDb, Neda Jahanshad PhDb,

Talia M. Nir PhDb, Paul M. Thompson PhDb, Xiaoming Du PhD a, Bhim M. Adhikari PhDa,

Alice Kochunov MDc, Ryan Cassidy, MD, PhDa, Yizhou Ma PhDa, Joshua Chiappelli MDd, Seth Ament PhDd,r,

Yezhi Pan MSd, Shuo Chen PhDd, Alan R. Shuldiner MDe, Braxton D. Mitchell PhDe,

L. Jair Soares MDa, Elliot Hong MDa

1. Faillace Department of Psychiatry and Behavioral Sciences at McGovern Medical School, The University of Texas Health Science Center at Houston, Houston, TX, USA.
2. Imaging Genetics Center, Stevens Neuroimaging & Informatics Institute, Keck School of Medicine of USC, Marina del Rey, CA, USA
3. CuriMeta, St. Louis, MO, USA
4. Department of Psychiatry, University of Maryland School of Medicine, Baltimore, MD, USA
5. Department of Medicine, University of Maryland School of Medicine, Baltimore, MD, USA

**Corresponding Author**

Dr. Peter Kochunov ([peter.kochunov@uth.tmc.edu](mailto:peter.kochunov@uth.tmc.edu))

**Funding**

Support was received from National Institutes of Health grants RF1NS114628, R01NS114628, R01MH112180, R01MH133812, R01MH116948, S10OD023696, R01EB015611, R01MH117601, R01AG095874, U01MH108148, and R01ES033961. These funding sources provided financial support to enable design and conduct of the study or collection, management, or analysis of the data. None of the funding agencies had a role in interpreting the data or in the preparation, review, or approval of the manuscript. None had a role in the decision to submit the manuscript for publication.

**Imaging in ACP, UKBB, ADNI and OASIS**

The imaging data for the ACP were collected at the Maryland Psychiatric Research Center using a Siemens Prisma 3 Tesla scanner using a 64-channel coil. T1- and T2-weighted data were collected using the Human Connectome Project (HCP) protocol with a field of view (FOV) of 256 mm and 0.8x0.8x0.8 mm isotropic resolution (TR/TE/TI/flip angle=2400 ms/2.2 ms/1000 ms/8 degrees for T1w and TR/TE/Turbo factor/flip angle=3200 ms/563 ms/314/variable for T2w). In-plane GRAPPA, with partial phase imaging, was used with an acceleration factor of 2. Two repetitions of each were collected to improve the signal-to-noise ratio(37). Diffusion-weighted imaging (DWI) data were collected using an expansion of the HCP protocol that consisted of 6 shells of *b*-values (*b*=600, 900, 1200, 1500, 1800, and 3000 s/mm^2) with 98 isotropically distributed diffusion-weighted directions per shell collected twice with a reversal of the phase encoding and readout gradients (anterior-to-posterior AP and posterior-to-anterior PA) to correct for spatial distortions. We also included twenty b=0 images interleaved within the acquisition. The data was collected using a multiband, echo-planar, spin-echo, T2-weighted sequence (TE/TR/Multiband Factor=97/4000 ms/4 with the FOV=200 mm) with an isotropic spatial resolution of 1.6 mm. All data were preprocessed using the HCP minimal processing pipeline, which included FreeSurfer analysis including quantification of regional cortical thickness and subcortical gray matter volumes(38). Diffusion MRI data were preprocessed using the HCP Diffusion pipeline(38, 39) that was combined with DESIGNER diffusion preprocessing tools, including advanced denoising, Gibbs ringing correction, and correction of EPI distortions(40). FA maps were obtained by fitting the diffusion tensor model using the FSL-FDT toolkit(41).

Regional neuroimaging phenotypes in UKBB were extracted from the data collected with a Siemens Skyra 3T scanner using a standard 32-channel radiofrequency (RF) head coil. The imaging protocol collected high resolution T1-weighted 3D MP-RAGE scans (resolution=1x1x1 mm, FOV=208x256x256, duration=5 minutes, sagittal, in-plane acceleration iPAT=2, prescan-normalize) and 3D T2 FLAIR images (resolution=1.05x1x1 mm, FOV=192x256x256, duration=6 minutes, 3D SPACE, sagittal, in-plane GRAPPA with partial phase imaging acceleration factor of 2, and partial 7/8 Fourier sampling). Diffusion data were collected with a resolution of 2x2x2 mm and two diffusion shells of *b*=1000 and 2000 s/mm^2 with 50 diffusion directions per shell and 5 *b*=0 images (FOV=104x104x72, duration=7 minutes). Imaging data was processed using the UKBB workflow that is based on ENIGMA structural and DTI pipelines. Details of the image preprocessing and analysis are provided by the UKBB ([biobank.ctsu.ox.ac.uk/crystal/crystal/docs/brain_mri.pdf](http://biobank.ctsu.ox.ac.uk/crystal/crystal/docs/brain_mri.pdf)).

All ADNI neuroimaging were pre-processed (gradient warping, scaling, inhomogeneity correction), and cortical reconstruction and volumetric segmentation were performed by the University of California-San Francisco (UCSF) using FreeSurfer v5.1 for ADNI GO/2 and FreeSurfer v6.0 for ADNI-3. The resulting summary metrics and QC were downloaded from the ADNI database ([www.loni.usc.edu/ADNI](http://www.loni.usc.edu/ADNI)). Amyloid burden was measured via standardized uptake value ratios (SUVR) for [18F]-Florbetapir (AV45) and [18F]-florbetaben (FBB) amyloid PET tracers. Additional details of the PET methodology are available at <http://adni.loni.usc.edu/data-samples/pet/>. Of the 781 participants with amyloid PET and MRI (age: 72.8±7.1, 56%F), 132 Aβ+ individuals met clinical criteria for dementia and were included as cases and 223 healthy Aβ- individuals were analyzed as controls.

The OASIS dataset includesparticipants enrolled in ongoing brain imaging studies conducted at the Washington University St. Louis Charles F. and Joanne Knight Alzheimer Disease Research Center (ADRC) over the course of 30 years. We used the OASIS-3 dataset because it includes amyloid burden data (42) that were measured via AV45 and [11C]-Pittsburgh Compound B (PiB) PET tracers. Amyloid positivity was determined using a centiloid cut-off of 20.6 for AV45 and 16.4 for PiB. Of the 507 participants with amyloid PET and MRI (age: 70.5±9.5, 59%F), we identified 36 Aβ+ individuals who also met clinical criteria for dementia, and 180 healthy Aβ- controls.

**Genotyping for APOE status**

For the ACP sample, exome capture and sequencing were performed at the Regeneron Genetics Center (RGC). Exome capture was performed using xGen design available from Integrated DNA Technologies (IDT) (51). The captured libraries were sequenced on the Illumina HiSeq 2500 platform with v4 chemistry using 75 bp paired-end reads. Paired-end sequencing of the captured bases was performed so that >85% of the bases were covered at 20x depth or greater, which is sufficient for calling heterozygous variants across most of the targeted bases. Read alignment and variant calling were performed using BWA-MEM and GATK as implemented in the RGC DNAseq analysis pipeline. SNPs with call rate <90%, and monomorphic SNPs were excluded. SNPs on X and Y chromosomes and the mitochondrial genome were also excluded. All samples passed QC metrics for contamination, low coverage, high levels of Mendelian errors or duplicates (51).

For the UKBB sample genetic data were gathered using Affymetrix UK BiLEVE Axiom array, which genotyped approximately 850,000 variants. The protocol may be found in the UKBB Quality Control Documentation (<https://www.ukbiobank.ac.uk/wp-content/uploads/2014/04/UKBiobank_genotyping_QC_documentation-web-1.pdf>). Briefly, low-quality single nucleotide polymorphisms (SNP) were filtered out according to Affymetrix recommendations. SNP variants were imputed with a merged UK10K and 1000 Genomes Phase 3 reference panel by a group headed by the Wellcome Trust Centre for Human Genetics using the IMPUTE3 program. All of these steps are detailed in the Imputation Documentation (<https://www.ukbiobank.ac.uk/wp-content/uploads/2014/04/imputation_documentation_May2015-1.pdf>). Post-imputation quality control consisted of filtering SNPs based on minor allele frequency (MAF) (<0.01), Hardy-Weinberg Equilibrium (<1·10-6), R-squared (<0.03), and call rate (<0.95).

For the ADNI sample genetic data were analyzing using Human610-Quad BeadChip (Illumina, Inc., San Diego, CA) included 620,901 SNP and CNV markers. The two SNPs (rs429358, rs7412) that define the APOE ɛ2 and ɛ3 alleles, were not on the Human610-Quad BeadChip, and therefore were genotyped using DNA extracted by Cogenics (52)

In all samples, APOE ɛ2, ɛ3. and ɛ4 alleles were determined based on genotypes of the single-nucleotide variants rs429358 and rs7412: ɛ2 = rs429358 T and rs7412 T; ɛ3 = rs429358 T and rs7412 C; ɛ4 = rs429358 C and rs7412 C. The primary analysis was to compare APOE-ε4 carriers, which included ε4/ε3 or ε4/ε4 genotypes (no ε4/ε2 genotype in these samples), with non-carriers (controls) that included ε3/ε3, ε3/ε2 or ε2/ε2 genotypes.

The analyses in the discovery sample were limited to N=91 (38M/ 53F, age: 48.0±12.5) APOE-ε4 allele carriers and N=244 (96M/148F, age: 48.9±12.3) non-carrier controls after excluding subjects with missing data and ambiguous APOE-ε4 status due to unphased microarray data where a rare ε1 allele could be paired with ε3, producing an indistinguishable genotype. The analyses of UKBB were limited to N=7,339 (3,390M/3,949F, age=63.5±7.5) APOE-ε4 allele carriers and N=18,671 (8,909M/9,762F, age: 63.9 ±7.5) non-carrier controls after excluding subjects with missing data, ambiguous APOE-ε4 status, and having an ICD code that corresponded to a diagnosis of neurological or mental illnesses such as stroke, Parkinson’s disorder, dementia, schizophrenia, bipolar depression and others.

***Methods for the Simulation Study***

We developed a simulation to evaluate the effect of tracking onset of dementia using RVI. We hypothesized a screening program where MRI scans are repeated annually, triennially and even every five years and evaluated the elevation in RVI using cumulative odds ratio of conversion using the ADNI dataset that span a 12-year period. This simulation was designed to evaluate how the frequency of data collection can influence the relationship between observed RVI and the odds of conversion over time, under the assumption that the RVI reflects the underlying neurobiological condition and is associated with the conversion of AD.

We simulated a cohort of N=500 subjects, each tracked over 12 years. The initial RVI for each subject at baseline (year 1) was drawn from a normal distribution. We let RVI increase by a random increment (i.e., neurological decline) over time for 10% of the subjects, reflecting changes in disease progression. The binary outcome (conversion to dementia) was simulated for each subject *i* at time point *t* based on the current RVI score and the APOE-ε4 genotype. The log-odds of conversion were modeled as:

where is probability of conversion and represents the random noise. was predefined as , indicating a 100% increase in the odds of conversion for each unit increase in RVI. Subsequently, the conversion outcome for all subjects who have not converted in the previous time point was determined by comparing to the 90 percentiles of

*Scanning schedules*

We assessed the effect of different RVI recalculation frequencies by modeling the relationship between the observed RVI (denoted as ) and the odds of conversion as follows:

(1) Baseline-only measurement: In this scenario, was measured only at baseline (). Therefore,

(2) Annual measurement: RVI was measured at each time point *t*, i.e., for all .

(3) Every 3 years: In this scenario, was measured at baseline () and every three years thereafter (). For the years between measurements, was carried forward from the most recent scan:

(4) Every 5 years: was measured at baseline () and every five years (). Similar to scenario (3), at intervening years was carried forward from the most recent measurement:

We calculated the cumulative odds ratio for AD conversion based on for each scenario. Additionally, model performance was assessed using the area under the receiver operating characteristic curve (AUC).

***Results***

***APOE Genotype and Cardiovascular Risk on Tissue-Specific RVI-AD***

*Discovery in the ACP sample*

We further evaluated the tissue specific RVIs for AD. In ACP, Model 1 was significant for cortical RVI-AD (F=3.0, p=0.03). There was a significant genotype x FCVRS interaction (t=2.4, p=0.02) (**Table S1**) but no significant main effect of FCVRS (p=0.10) or genotype (p=0.45). Cortical RVI in APOE-ε4 carriers showed significant correlation with FCVRS (r=0.24, p=0.02). In controls, these correlations were insignificant (r=0.05, p=0.4), but the correlation coefficients were not significantly different (z=1.7, p=0.1).

For subcortical RVI-AD, the full model was also significant (F=4.8, p=0.002). There was no significant genotype x FCVRS interaction (p=0.71) or main effect of genotype (p=0.54), but a significant main effect of FCVRS (t=3.2, p=0.001). For white matter RVI-AD, the full model was not significant (F=2.6, p=0.052).

*Replication in the UKBB sample*

For cortical RVI-AD, the full model was significant (F=3.2, p=0.02). There was a significant genotype x FCVRS interaction (t=2.4, p=0.02) (**Table S1**), significant main effect of FCVRS (t=2.8, p=0.005) but no significant effect of genotype (p=0.06). Cortical RVI in APOE-ε4 carriers showed significant correlation with FCVRS (r=0.05, p=1·10-5). In controls, these correlations were not significant (r=0.00, p=0.9), and the correlation coefficients were significantly different (z=3.6, p=1·10-4).

For subcortical RVI-AD, the model was significant (F=9.2, p=4.1x10-6). However, there was no significant genotype x FCVRS interaction (p=0.08), FCVRS (p=0.18), or genotype (p=0.84) effects. Subcortical RVI showed no significant correlation with FCVRS in either APOE-ε4 carriers or non-carriers (r=0.01 and 0.00, p<0.2).

For white matter RVI-AD, the model was also significant (F=8.7, p=8.7x10-6). There was a significant genotype x FCVRS interaction (t=3.2, p=0.001) (**Table S1**), significant main effect of FCVRS (t=3.2, p=0.002) but no significant effect of genotype (p=0.06). White matter RVI in APOE-ε4 carriers showed significant correlation with FCVRS (r=0.05, p=2·10-5). In controls, these correlations were insignificant (r=0.00, p=0.4), and the correlation coefficients were significantly different (z=3.5, p=5·10-4).

Therefore, similar trends are observed in some tissue specific RVIs, but overall, none shows better replicability and robustness than the whole-brain RVI-based models in capturing the APOE and FCVRS risks.

***Supplementary Tables***

| ***Phenotype/Brain Region*** | **AD Effect Size (Cohen’s d)** | **APOE4 Effect Sizes (Cohen’s d)** | |
| --- | --- | --- | --- |
| **ADNI-OASIS** | **ACP** | **UKBB** |
| ***Cortical Thickness*** | | | |
| Banks of Superior Temporal Sulcus | -1.19 | -0.070 | -0.001 |
| Caudal Anterior Cingulate Cortex | 0.07 | -0.062 | 0.008 |
| Caudal Middle Frontal Gyrus | -0.88 | -0.035 | -0.002 |
| Cuneus | -0.18 | -0.019 | 0.005 |
| Entorhinal Cortex | -1.88 | -0.087 | -0.005 |
| Frontal Pole | -0.32 | -0.034 | 0.006 |
| Fusiform Gyrus | -1.40 | -0.033 | -0.006 |
| Inferior Parietal Cortex | -1.29 | -0.041 | -0.001 |
| Inferior Temporal Gyrus | -1.45 | -0.046 | -0.014 |
| Insula | -0.80 | -0.034 | -0.002 |
| Isthmus Cingulate Cortex | -0.74 | -0.093 | 0.009 |
| Lateral Occipital Cortex | -0.60 | -0.064 | -0.007 |
| Lateral Orbitofrontal Cortex | -0.67 | -0.049 | -0.010 |
| Lingual Gyrus | -0.47 | -0.089 | 0.000 |
| Medial Orbitofrontal Cortex | -0.62 | -0.061 | -0.004 |
| Middle Temporal Gyrus | -1.48 | -0.054 | -0.019 |
| Paracentral Lobule | -0.22 | -0.033 | -0.003 |
| Parahippocampal Gyrus | -0.88 | -0.057 | -0.003 |
| Pars Opercularis of Inferior Frontal Gyrus | -0.69 | -0.048 | -0.003 |
| Pars Orbitalis of Inferior Frontal Gyrus | -0.53 | -0.046 | -0.009 |
| Pars Triangularis of Inferior Frontal Gyrus | -0.42 | -0.022 | 0.004 |
| Pericalcarine Cortex | -0.06 | -0.024 | -0.001 |
| Postcentral Gyrus | -0.45 | -0.086 | 0.006 |
| Posterior Cingulate Cortex | -0.44 | -0.056 | 0.000 |
| Precentral Gyrus | -0.39 | -0.064 | -0.002 |
| Precuneus | -1.14 | -0.047 | 0.005 |
| Rostral Anterior Cingulate Cortex | -0.19 | -0.035 | -0.006 |
| Rostral Middle Frontal Gyrus | -0.66 | -0.063 | 0.002 |
| Superior Frontal Gyrus | -0.70 | -0.060 | 0.004 |
| Superior Parietal Cortex | -0.81 | -0.038 | 0.012 |
| Superior Temporal Gyrus | -1.39 | -0.076 | -0.008 |
| Supramarginal Gyrus | -0.99 | -0.057 | 0.002 |
| Temporal Pole | -1.19 | -0.041 | 0.003 |
| ***Subcortical Volume*** | | | |
| Accumbens | -0.91 | -0.088 | 0.008 |
| Amygdala | -1.80 | -0.069 | -0.011 |
| Caudate | -0.07 | -0.009 | -0.010 |
| Hippocampus | -1.93 | -0.088 | -0.010 |
| Palladium | -0.11 | -0.097 | 0.009 |
| Putamen | -0.56 | -0.085 | -0.005 |
| Thalamus | -0.73 | -0.045 | -0.010 |
| White Matter | ADNI Effect Size |  |  |
| Anterior Corona Radiata (ACR) | -0.8 | -0.042 | -0.009 |
| Anterior Limb of Internal Capsule (ALIC) | -0.4 | -0.026 | -0.003 |
| Body of Corpus Callosum (BCC) | -0.58 | -0.034 | -0.010 |
| Cingulum (CGC) | -0.66 | -0.036 | -0.004 |
| Cingulum hippocampus gyrus (CHG) | -0.95 | -0.047 | -0.006 |
| Corona Radiata (CR) | -0.24 | -0.049 | 0.010 |
| Corpus Callosum (CC) | -0.81 | -0.034 | -0.005 |
| Cortico-Spinal Tract (CST) | -0.45 | -0.090 | 0.009 |
| External Capsule (EC) | -0.1 | -0.034 | -0.010 |
| Fornix (FX) | -1.34 | -0.056 | -0.011 |
| Fornix-Stria Terminalis (FXST) | -1.04 | -0.074 | -0.012 |
| Genu of Corpus Callosum (GCC) | -0.6 | -0.037 | -0.008 |
| Internal Capsule (IC) | -0.22 | -0.042 | 0.000 |
| Posterior Corona Radiata (PCR) | 0.07 | -0.061 | 0.004 |
| Posterior Limb of Internal Capsule (PLIC) | -0.09 | -0.057 | -0.005 |
| Posterior Thalamic Radiation(PTR) | -0.55 | -0.066 | 0.006 |
| Retrolenticular Limb of the Internal Capsule (RLIC) | -0.06 | -0.011 | 0.009 |
| Sagittal Striatum (SS) | -0.82 | -0.051 | -0.006 |
| Splenium of Corpus Callosum (SCC) | -1.09 | -0.042 | 0.006 |
| Superior Corona Radiata (SCR) | 0.20 | 0.022 | -0.004 |
| Superior Fronto-Occipital Fasciculus (SFO) | -0.08 | -0.036 | -0.008 |
| Superior Longitudinal Fasciculus (SLF) | -0.28 | -0.056 | 0.005 |
| Tapetum (TAP) | -0.23 | -0.064 | 0.005 |
| Uncinate Fasciculus (UNC) | -0.29 | -0.037 | -0.010 |

**Table S1.** Effect sizes (Cohen’s *d*) for regional cortical gray matter thickness, subcortical volumes and white matter for Alzheimer’s disease (AD) were derived from ADNI and OASIS samples. The cortical and subcortical effect sizes for AD were derived from N=168 Aβ+ dementia cases and 403 Aβ- healthy controls collected by ADNI and OASIS. AD effect sizes for DTI were taken from (Kochunov et al., 2020) Table S4. All AD effect sizes were corrected for age, sex and their interaction and site effects.

| ***Cohort/Variable*** | ***E4*** | ***FCVRS*** | ***E4 x FCVRS*** | ***Model*** |
| --- | --- | --- | --- | --- |
| ***ACP*** |  |  |  |  |
| RVI-cortical thickness | -1.5±2.0 (t=-0.5,p=0.7) | 0.34±0.22 (t=1.6,p=0.1) | 0.55±0.22 (t=2.4,p=0.01) | F=3.1, p=0.01 |
| RVI-subcortical gray matter volume | 0.3±.4 (t=0.6,p=0.5) | 0.17±0.05 (t=3.2,p=0.001) | 0.02±0.05 (t=0.4,p=0.7) | F=4.2, p=0.006 |
| RVI-white matter | 0.2±.9 (t=0.2,p=0.9) | 0.28±0.11 (t=2.5,p=0.01) | 0.07±0.11 (t=0.4,p=0.6) | F=3.2, p=0.03 |
|  |  |  |  |  |
|  |  |  |  |  |
| ***UKBB*** |  |  |  |  |
| RVI-cortical thickness | 0.94±0.5 (t=1.9,p=0.05) | 0.13±0.04 (t=3.2,p=1·10-3) | 0.14±0.04 (t=3.3,p=9·10-4) | F=8.7, p=8·10-6 |
| RVI-subcortical gray matter volume | -0.05±0.26 (t=-.11, p=0.9) | 0.03±0.02 (t=1.4, p=0.2) | 0.04±0.02 (t=1.9, p=0.05) | F=4.1, 4=3·10-3 |
| RVI-white matter | 0.95±0.5 (t=1.9,p=0.05) | 0.13±0.04 (t=3.2,p=1·10-3) | 0.14±0.04 (t=3.3,p=9·10-4) | F=8.7, p=8·10-6 |
|  |  |  |  |  |

**Table S2**. Evaluating model 1 in participants of Amish Connectome Project (ACP) and UK biobank (UKBB) studies.

| **Year** | **Model 2 (RVI)** | **Model 3 (RVI + E4 + FCVRS)** |
| --- | --- | --- |
| 1 | 0.74 | 0.75 |
| 2 | 0.59 | 0.60 |
| 3 | 0.62 | 0.61 |
| 4 | 0.61 | 0.61 |
| 5 | 0.63 | 0.62 |
| 6 | 0.63 | 0.63 |
| 7 | 0.63 | 0.62 |
| 8 | 0.62 | 0.62 |
| 9 | 0.63 | 0.63 |
| 10-12 | 0.63 | 0.63 |

**Table S3**. Cumulative AUC calculated using Models 2 and 3 using baseline RVI.

***Supplementary Figure***.

**Figure S1**. Simulated Area Under the Curve (AUC) for predicting conversion from MCI to dementia for RVI-based screening program using assessment based on annual, triennial, and every 5-year follow up scans: scanning every 1 to 3 years would maintain clinically meaningful AUC at 0.75 to 0.8 range.

AUC


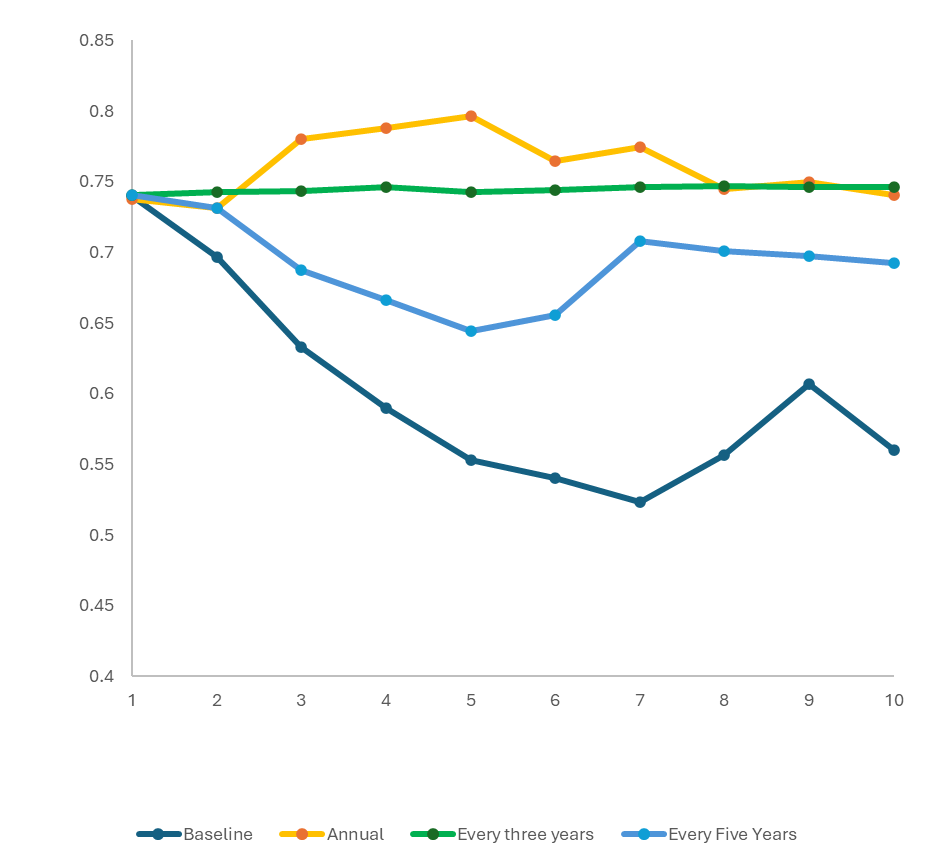

Supplement: Supplementary file 1 [file d846eedd35d550ff75b94fd2.docx]
